# Supplementary material for: Advancing outcome measure development and analytical approaches: Pain in Animals Workshop 2023
Source: Frontiers journal article supplement (doi:10.3389/fpain.2025.1615862), 2025-08-21
Supplement: Data_Sheet_1.pdf [file Data_Sheet_1.pdf]

# PAIN IN ANIMALS WORKSHOP 2023 (PAW2023)

## Advancing Outcome Measure Development and Analytical Approaches

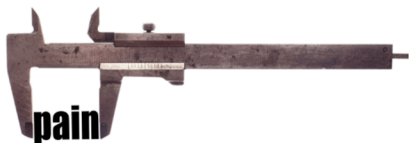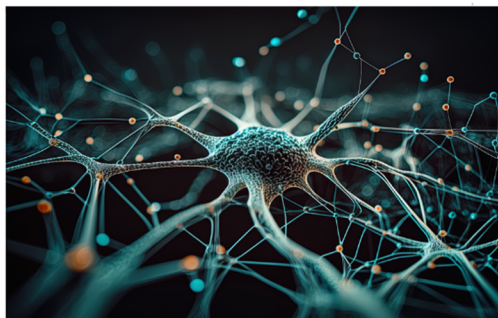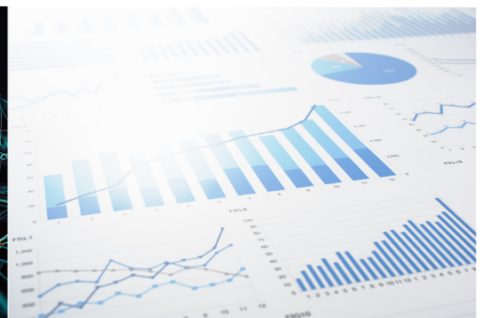

September 26 - 27, 2023 • National Institutes of Health •  
Bethesda, Maryland

# Thank you to our sponsors

The  
**MAYDAY**  
...  
Fund

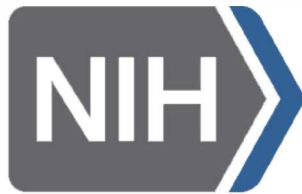

National Institute of  
Neurological Disorders  
and Stroke

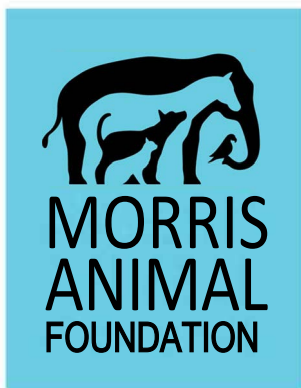

Comparative Pain  
Research and  
Education Centre

# Tuesday, September 26, 2023

| TIME            | DESCRIPTION                                                                                                                                                                                                                                 | SPEAKER                                                                                                                          |
|-----------------|---------------------------------------------------------------------------------------------------------------------------------------------------------------------------------------------------------------------------------------------|----------------------------------------------------------------------------------------------------------------------------------|
| 8:00am-9:00am   | Registration /Check-In                                                                                                                                                                                                                      |                                                                                                                                  |
| 9:00am-9:10am   | Welcome                                                                                                                                                                                                                                     |                                                                                                                                  |
|                 | <b>Updates on Validated Approaches to Measuring Pain</b>                                                                                                                                                                                    |                                                                                                                                  |
| 9:10am-9:50am   | Michele Sharkey PAW Lecture: Outcome Assessment in Veterinary Pain Studies: The Yellow Brick Road Continues                                                                                                                                 | Dottie Brown, MSCE, DVM, DACVS<br>Mars Veterinary Health                                                                         |
| 9:50am-10:10am  | Measurement Properties of Pain Scoring Instruments in Farm Animals                                                                                                                                                                          | Marina Cayetano Evangelista, MV, MSc, PhD<br>Université de Montréal                                                              |
| 10:10am-10:30am | Biomarker Update: What Progress Have We Made?                                                                                                                                                                                               | Daniel Barratt, BSc(Hons), PhD<br>University of Adelaide                                                                         |
| 10:30am-10:50am | BREAK                                                                                                                                                                                                                                       |                                                                                                                                  |
| 10:50am-11:10am | Artificial Intelligence in Veterinary Medicine                                                                                                                                                                                              | Parminder S. Basran, PhD, FCCPM<br>Cornell University                                                                            |
| 11:10am-11:30pm | Application of AIML to Large Animals for Pain Measurement                                                                                                                                                                                   | Eduarda Bortoluzzi, BVMS, MS, PhD<br>Kansas State University                                                                     |
| 11:30am-12:00pm | <i>Discussion on advances in measurement tools, use of biomarkers and potential application of AI to pain measurement</i>                                                                                                                   | <b>Panel Discussion</b><br>(Evangelista, Barratt, Basran, Bortoluzzi)                                                            |
| 12:00pm-1:40pm  | <b>LUNCH</b><br>12:15 – 12.45 American Association of Swine Veterinarians "Assessing pain in pigs: A collaborative effort by industry, academia, and government to advance pig welfare."<br><br>12:45 – 1.15 Recent Advances in Rodent Pain | Sherrie Webb, MSc<br>American Association of Swine Veterinarians<br><br>Liezl Maree, MS<br>Salk Institute for Biological Studies |

|               |                                                                                         |                                                                             |
|---------------|-----------------------------------------------------------------------------------------|-----------------------------------------------------------------------------|
|               | Measurement: Automated Detection of Behaviors and Application of Deep Learning          |                                                                             |
|               | <b>Opportunity Areas (Biopsychosocial) for Additional Outcome Measure Development</b>   |                                                                             |
| 1:40pm-2:00pm | Overview of the Domains Impacted by Pain                                                | B. Duncan Lascelles, BSc, BVSc, PhD,<br>FRCVS<br>NC State University        |
| 2:00pm-2:50pm | The Biospsychosocial Model of Pain                                                      | Mark Hutchinson, BSc, PhD<br>University of Adelaide                         |
| 2:50pm-3:20pm | BREAK                                                                                   |                                                                             |
| 3:20pm-3:50pm | Domains Impacted by Acute Pain                                                          | Ishmail Abdus-Saboor, PhD<br>Columbia University                            |
| 3:50pm-4:20pm | Domains Impacted by Chronic Pain                                                        | Kathleen Sluka, PT, PhD, FAPTA<br>University of Iowa                        |
| 4:20pm-4:40pm | <i>Discussion: Are Different Pain Conditions Impacting Various Domains Differently?</i> | <b>Panel Discussion</b><br><br>(Lascelles, Hutchinson, Abdus-Saboor, Sluka) |
| 4:45pm-7:00pm | Social w/ Drinks & Posters                                                              |                                                                             |

## Wednesday, September 27, 2023

| TIME          | DESCRIPTION                                                                   | SPEAKER                                                 |
|---------------|-------------------------------------------------------------------------------|---------------------------------------------------------|
|               | <b>Analytic Approaches to Utilize Outcome Measures in Clinical Trials</b>     |                                                         |
| 9:00am-9:20am | Approaches to Defining Clinically Meaningful Change in Trial Outcome Measures | Jennifer Gewandter, PhD, MPH<br>University of Rochester |

|                 |                                                                                                                             |                                                                                        |
|-----------------|-----------------------------------------------------------------------------------------------------------------------------|----------------------------------------------------------------------------------------|
| 9:20am-9:40am   | Creating MCID Thresholds in Veterinary Medicine: Estimating Minimal Clinically-Important Difference (MCID) for LOAD and COI | John F. Innes, BVSc, PhD, CertVR<br>DSAS(orth),FRCVS<br>University of Liverpool        |
| 9:40am-9:50am   | Discussion of Application of Success-Failure to Pain Outcome Measures: CBPI                                                 | Dottie Brown, MSCE, DVM, DACVS<br>Mars Veterinary Health                               |
| 9:50am-10:10am  | BREAK                                                                                                                       |                                                                                        |
| 10:10am-10:20am | Validated Scales for Assessing Acute Pain in Ruminants and Pigs: Approaches to Defining Success-Failure and What is Next?   | Stelio Luna, DVM, Ms, PhD, DipECVAA, CVA (IVAS)<br>São Paulo State University          |
| 10:20am-10:30am | Success-Failure: Ground Reaction Forces                                                                                     | Michael Conzemius, DVM, PhD, DACVS<br>Gilbert Queen Creek                              |
| 10:30am-10:50am | Use of AUC in Human Pain Studies                                                                                            | James N. Campbell, MD<br>Centrexion Therapeutics                                       |
| 10:50am-11:20am | <i>Discussion: Analytic Approaches to Utilize Outcome Measures in Clinical Trials</i>                                       | <b>Panel Discussion</b><br><br>(Gewandter, Innes, Luna, Conzemius, Campbell)           |
| 11:20am-12:30pm | LUNCH                                                                                                                       |                                                                                        |
| 12:30pm-12:50pm | Primary Endpoints: Single, Multiple Endpoints, or Composite Endpoints?                                                      | John T. Farrar, MD, PhD<br>University of Pennsylvania                                  |
| 12:50pm-1:10pm  | Statistical Considerations When Using Multiple or Composite Endpoints                                                       | Claire Ruberman, PhD<br>FDA CVM                                                        |
| 1:10pm-1:30pm   | Examples of Use of Multiple or Composite Endpoints in Veterinary Species: Food Animals                                      | Hans Coetzee, BVSc, Cert CHP, PhD, DACVCP, DACAW, DipECAWBM<br>Kansas State University |

|               |                                                                                                                               |                                                                   |  |
|---------------|-------------------------------------------------------------------------------------------------------------------------------|-------------------------------------------------------------------|--|
| 1:30pm-1:50pm | Adaptive and Other Innovative Pain Measurement Study Designs                                                                  | Qiao Zhang, MS, PhD<br>FDA CVM                                    |  |
| 1:50pm-2:10pm | <i>Discussion on Pros and Cons of Multiple / Composite Endpoints, Design Adaptations in Veterinary Clinical Pain Research</i> | <b>Panel Discussion</b><br><br>(Farrar, Ruberman, Coetzee, Zhang) |  |
| 2:10pm-2:30pm | <i>Open Discussion and Future Planning</i>                                                                                    |                                                                   |  |
